# Supplementary material for: Self-protected nickel–graphene hybrid low density 3D scaffolds
Source: Royal Society of Chemistry journal article supplement (doi:10.1039/c4ta04066j), 2014-01-01
Supplement: c4ta04066j1.pdf [file c4ta04066j1.pdf]

## Supporting Information

### **Self-Protected Nickel-Graphene Hybrid Low Density 3D Scaffolds**

**Moab Rajan Philip<sup>a</sup>, T. N. Narayanan<sup>b,\*</sup>, M. Praveen Kumar<sup>b</sup>, Shashi Bhushan Arya<sup>a</sup>  
and Deepak K. Pattanayak<sup>b,\*</sup>**

<sup>a</sup>National Institute of Technology, Karnataka, Surathkal, Mangalore, India.

<sup>b</sup>CSIR-Central Electrochemical Research Institute, Karaikudi, Tamilnadu, India.

(Corresponding Authors: [tn\\_narayanan@yahoo.com](mailto:tn_narayanan@yahoo.com)(T. N. N.), [pattanayak1977@gmail.com](mailto:pattanayak1977@gmail.com) (D.K.P.))

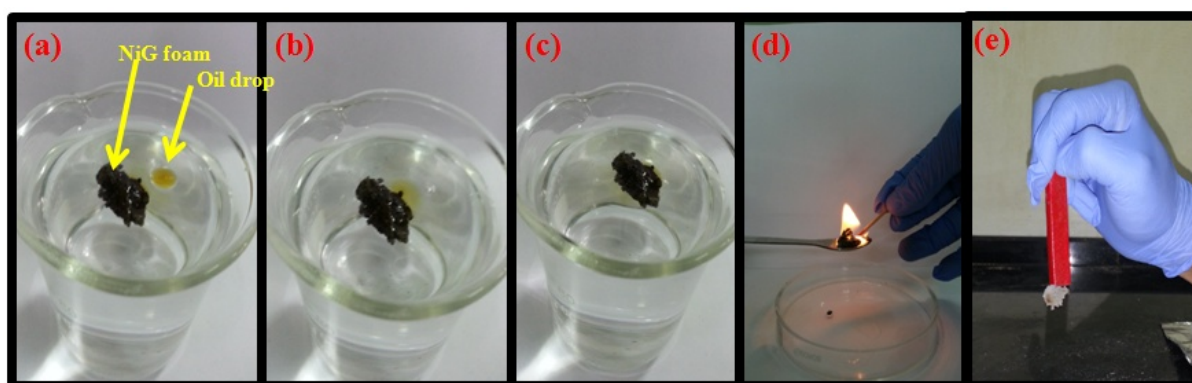

Figure S1: (a), (b), and (c) Figures depicting the adsorption of oil on the surface of NiG foam including the migration of oil (d) the presence of oil inside NiG is verified by burning the foam in air making it reusable as well as retaining magnetic nature (e) depicting that NiG foam where Ni foam surrounded by graphene does not oxidise upon burning in air and still the magnetic nature is retrieved.
